# Supplementary material
Source: PubMed Central journal article supplement (PMC5714584)
Supplement: NIHMS897085-supplement-Supplemental.pdf [file NIHMS897085-supplement-Supplemental.pdf]

# A PCR-independent Method of Transformation Associated Recombination Reveals the Cosmomycin Biosynthetic Gene Cluster in an Ocean Streptomycete

Charles B. Larson, Max Crüsemann, and Bradley S. Moore

## Supporting Information

### Table of Contents

|          |                                                                                                                                |
|----------|--------------------------------------------------------------------------------------------------------------------------------|
| SI2:     | <b>Figure S1</b> PCR screening of multiple yeast colonies                                                                      |
| SI3:     | <b>Figure S2</b> PCR screening of individual yeast colonies                                                                    |
| SI4:     | <b>Figure S3</b> PCR amplification of integrated cosmomycin pathway                                                            |
| SI5:     | <b>Figure S4</b> Sequencing of integrated cosmomycin pathway                                                                   |
| SI6:     | <b>Figure S5</b> MS2 fragmentation analysis of cosmomycin C ( <b>1</b> )                                                       |
| SI7:     | <b>Figure S6</b> MS2 fragmentation analysis of cosmomycin D ( <b>2</b> )                                                       |
| SI8:     | <b>Figure S7</b> MS1 spectrum of cosmomycin analog <b>3</b>                                                                    |
| SI9:     | <b>Figure S8</b> MS2 fragmentation analysis of cosmomycin analog <b>3</b>                                                      |
| SI10:    | <b>Figure S9</b> MS1 spectrum of cosmomycin analog <b>A</b>                                                                    |
| SI11:    | <b>Figure S10</b> MS2 fragmentation analysis of cosmomycin analog <b>A</b>                                                     |
| SI12:    | <b>Figure S11</b> MS2 fragmentation analysis of cosmomycin analog <b>B</b>                                                     |
| SI13:    | <b>Figure S12</b> <sup>1</sup> H NMR spectrum of cosmomycin C ( <b>1</b> )                                                     |
| SI14:    | <b>Figure S13</b> <sup>1</sup> H NMR spectrum of <b>A</b>                                                                      |
| SI15:    | <b>Figure S14</b> Overlaid <sup>1</sup> H NMR spectra of <b>1</b> and <b>A</b>                                                 |
| SI16:    | <b>Figure S15</b> HSQC NMR spectrum of <b>1</b>                                                                                |
| SI17:    | <b>Figure S16</b> HSQC NMR spectrum of <b>A</b>                                                                                |
| SI18:    | <b>Figure S17</b> COSY NMR spectrum of <b>1</b>                                                                                |
| SI19:    | <b>Figure S18</b> Molecular network of cosmomycin native producers and heterologous host.                                      |
| SI20:    | <b>Figure S19</b> <i>Streptomyces</i> sp. CNT-302 molecular network                                                            |
| SI21-23: | <b>Table S1</b> <sup>1</sup> H NMR chemical shift assignments of compound <b>1</b> , <b>A</b> , and related cosmomycin analogs |
| SI24-26: | <b>Table S2</b> Comparison of <i>Streptomyces</i> sp. CNT-302 and <i>S. olindensis</i> BGCs                                    |

**Figure S1.** PCR screening of multiple yeast colonies

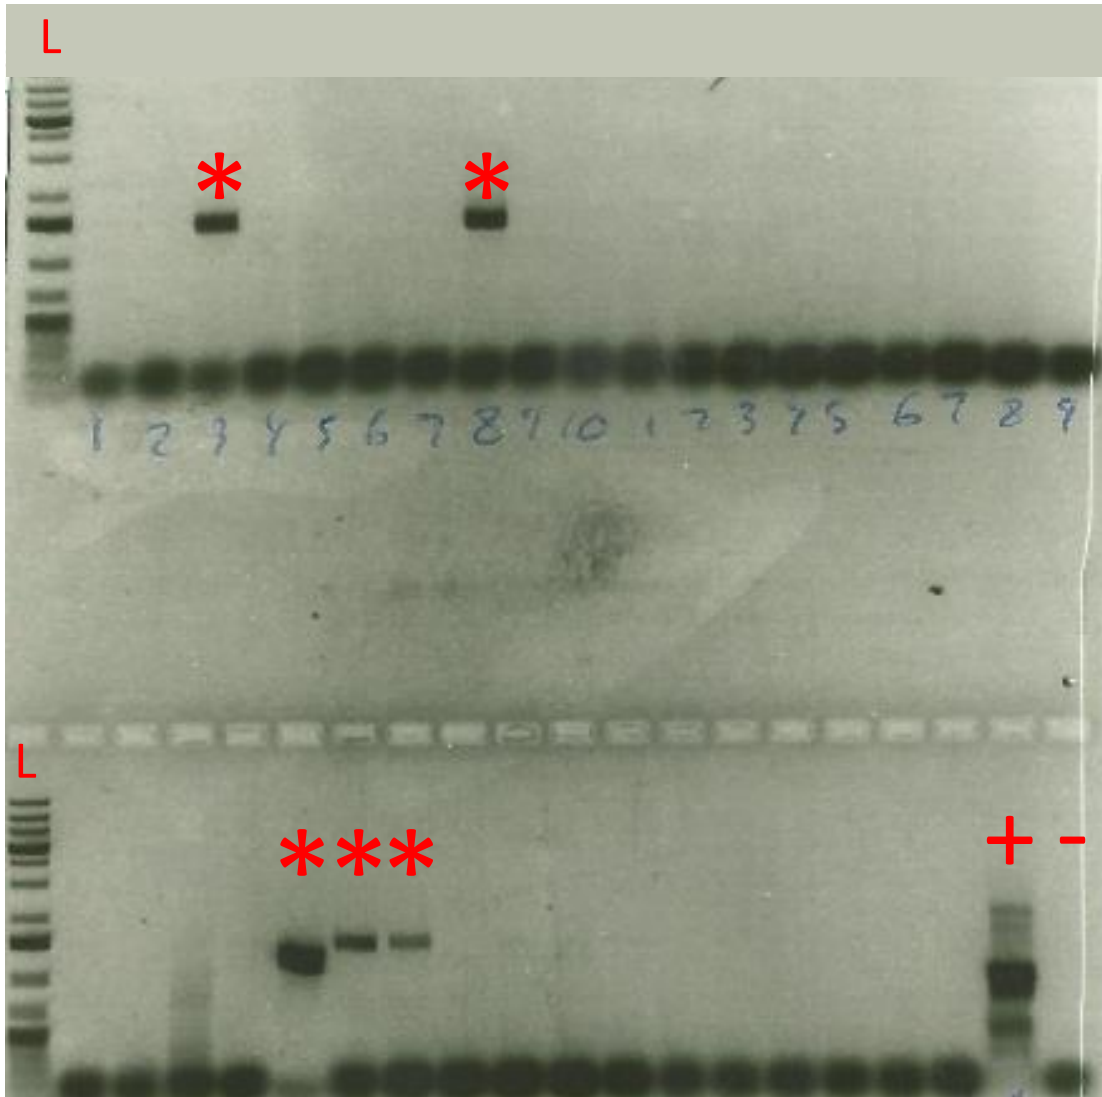

PCR amplification of a 1400 bp fragment of the target BGC performed on groups of 10 yeast clones. Positive amplification of target region indicated by “\*”. Positive and negative controls with and without CNT-302 gDNA shown as “+” and “-”, respectively. Lanes loaded with 1 kb-plus DNA ladder (ThermoFisher) labeled with “L”.

**Figure S2.** PCR screening of individual yeast colonies

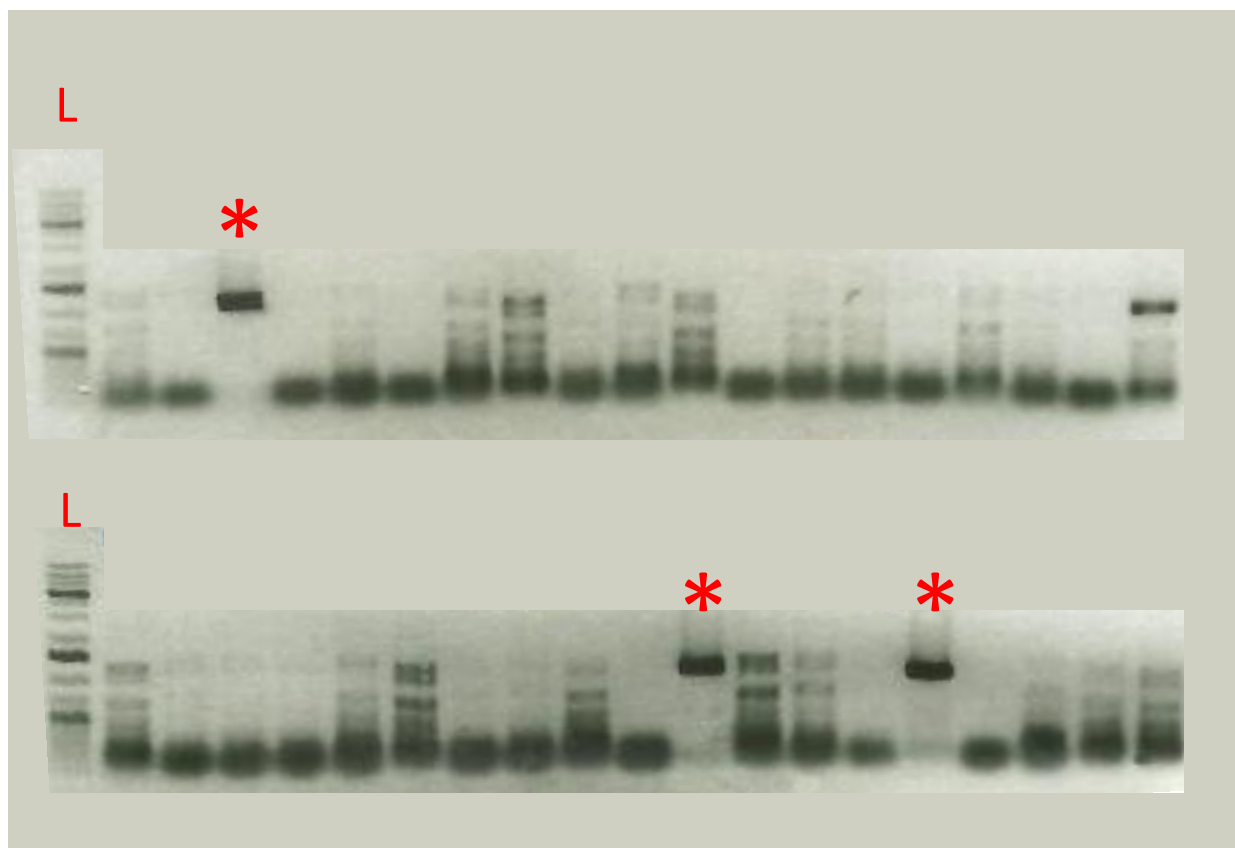

PCR amplification of a 1400 bp fragment of the target BGC performed on individual yeast clones. Lanes loaded with 1 kb-plus DNA ladder labeled with “L”. Positive hits indicated by “\*”. A total of three clones showed clean amplification, with another clone showing an amplification band with lower molecular weight DNA also in the lane. A total of 200 colonies were initially investigated, calculated transformation efficiency was 1.5%.

**Figure S4.** Sequencing of integrated cosmomycin pathway

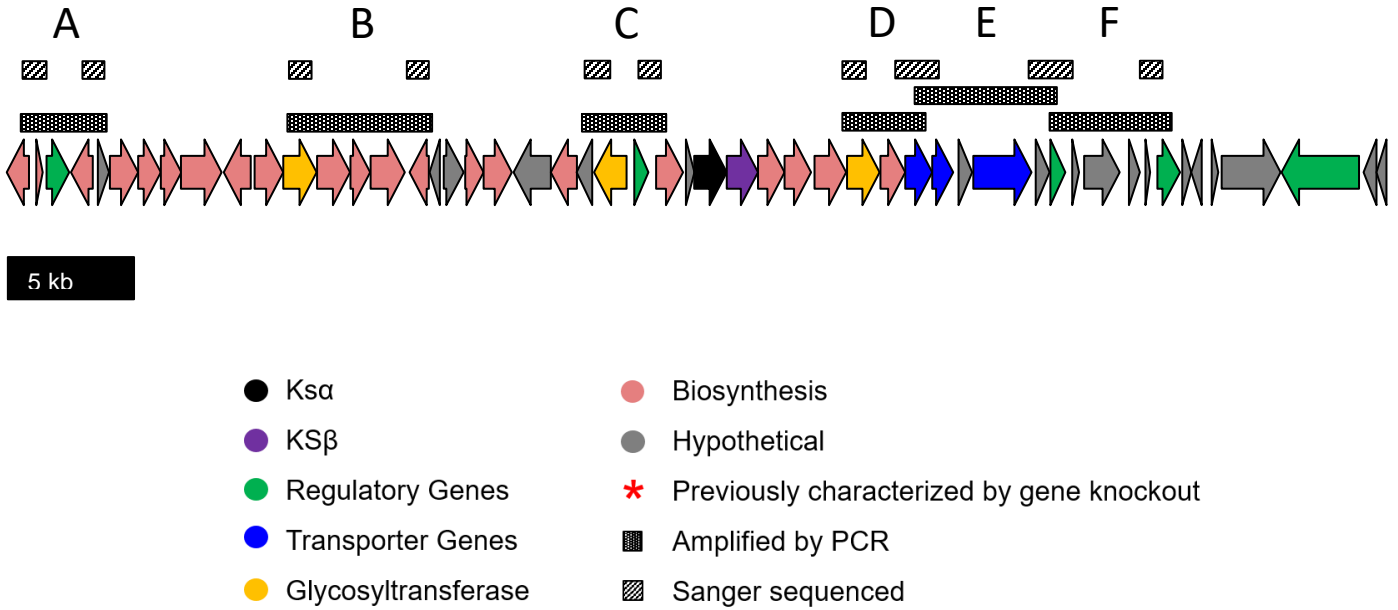

In order to further confirm proper assembly and integration of plasmid pCAP01-COS, regions A-F depicted above were amplified and Sanger sequenced. Results confirmed the sequence of the integrated pathway was correct for all amplicons. A total of 10 kb of the pathway was covered by the sequencing effort.

**Figure S3.** PCR amplification of integrated cosmomycin pathway

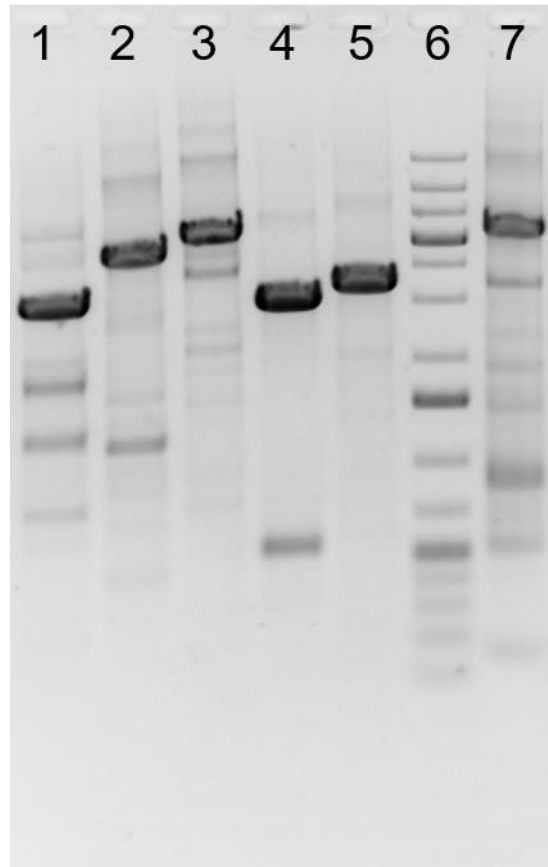

After integrating pCAP01-COS into the genome of *S. coelicolor* M512, various regions were amplified by PCR to confirm their size, proper assembly, and integration.

**Expected Size (bp)**

1: **3191** (Region D)

2: **4639** (Region F)

3: **5602** (Region E)

4: **3040** (Region C)

5: **3419** (Region A)

6: 1kb Plus Ladder: 20000, 10000, 7000, **5000**, 4000, 3000, 2000, **1500**, 1000, 700, **500**, 400, 300, 200

7: **5555** (Region B)

**Figure S5.** MS2 fragmentation analysis of cosmomycin C (1)

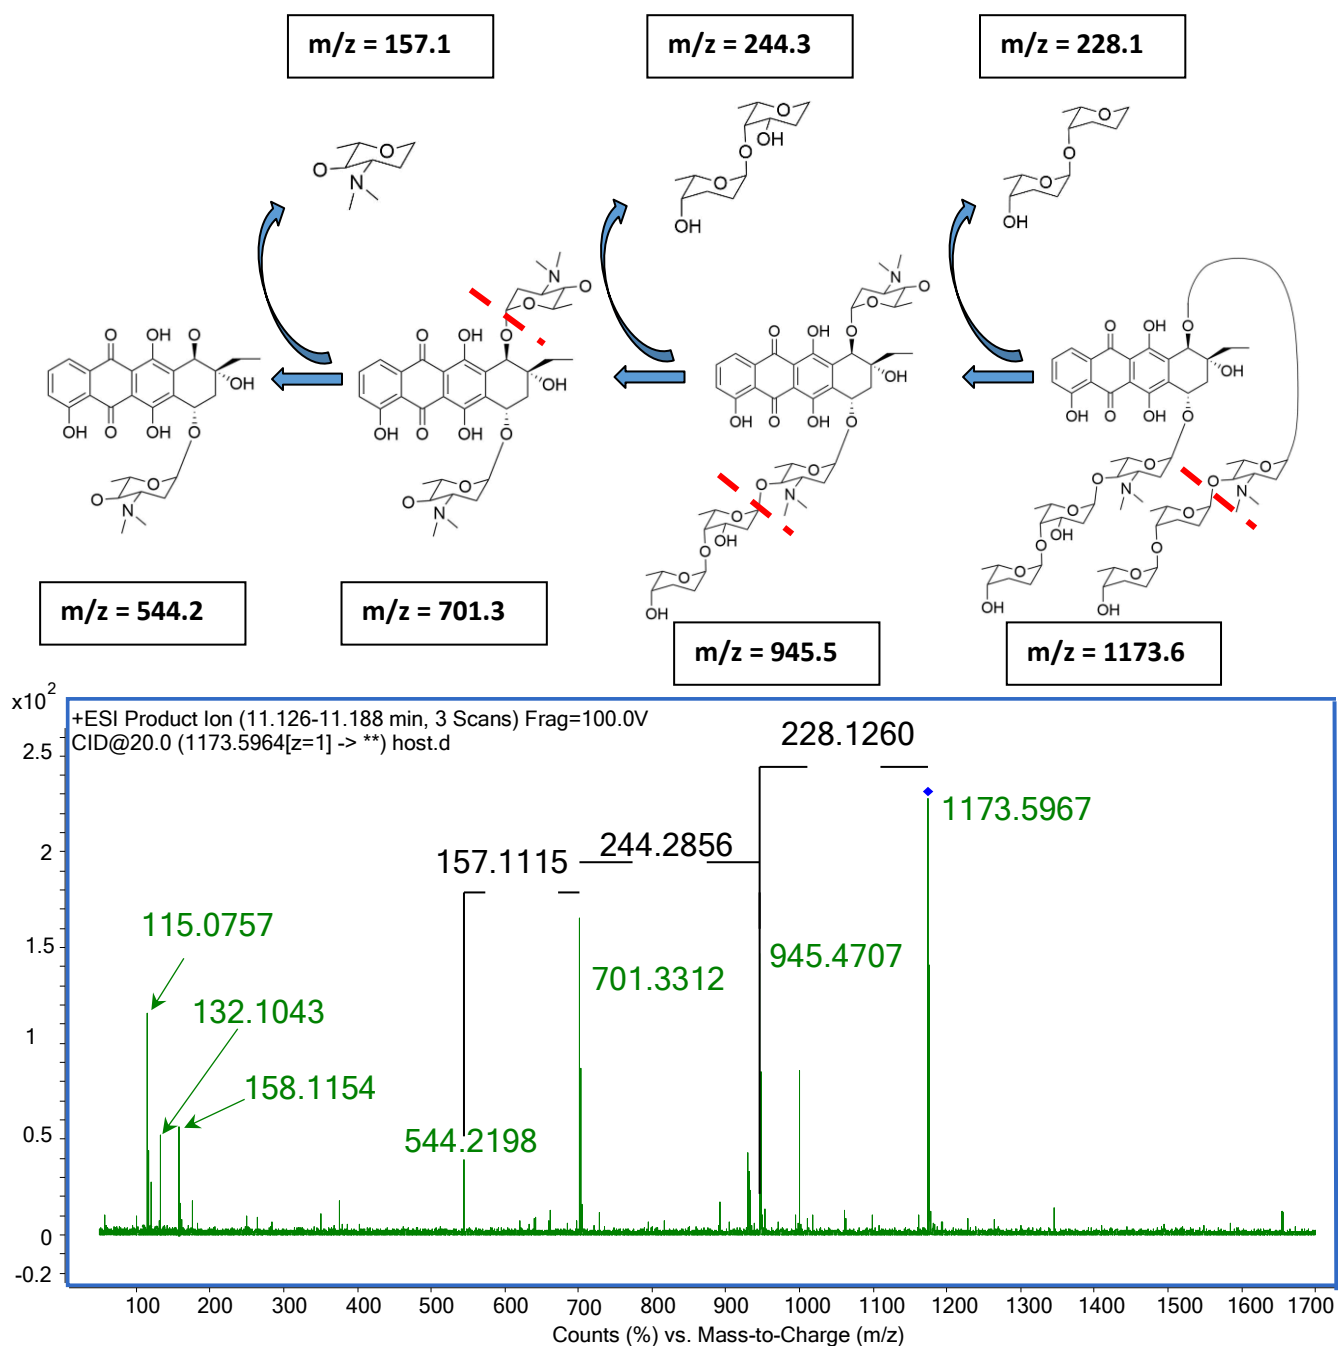

Fragmentation of parent ion 1173.59 shows losses corresponding to sugar moieties of cosmomycin C. The initial loss of 228 mass units correspond to the B ions of two rhodnose moieties, the two outermost sugars on one of the trisaccharide chains. The second loss of 244 corresponds to rhodnose and 2-deoxyfucose lost from the second trisaccharide chain. The last shift seen represents the loss of rhodosamine, with a B ion mass of 157. All three sugars can be seen in the lower mass range of the spectrum.

**Figure S6. MS2 fragmentation analysis of cosmomycin D (2)**

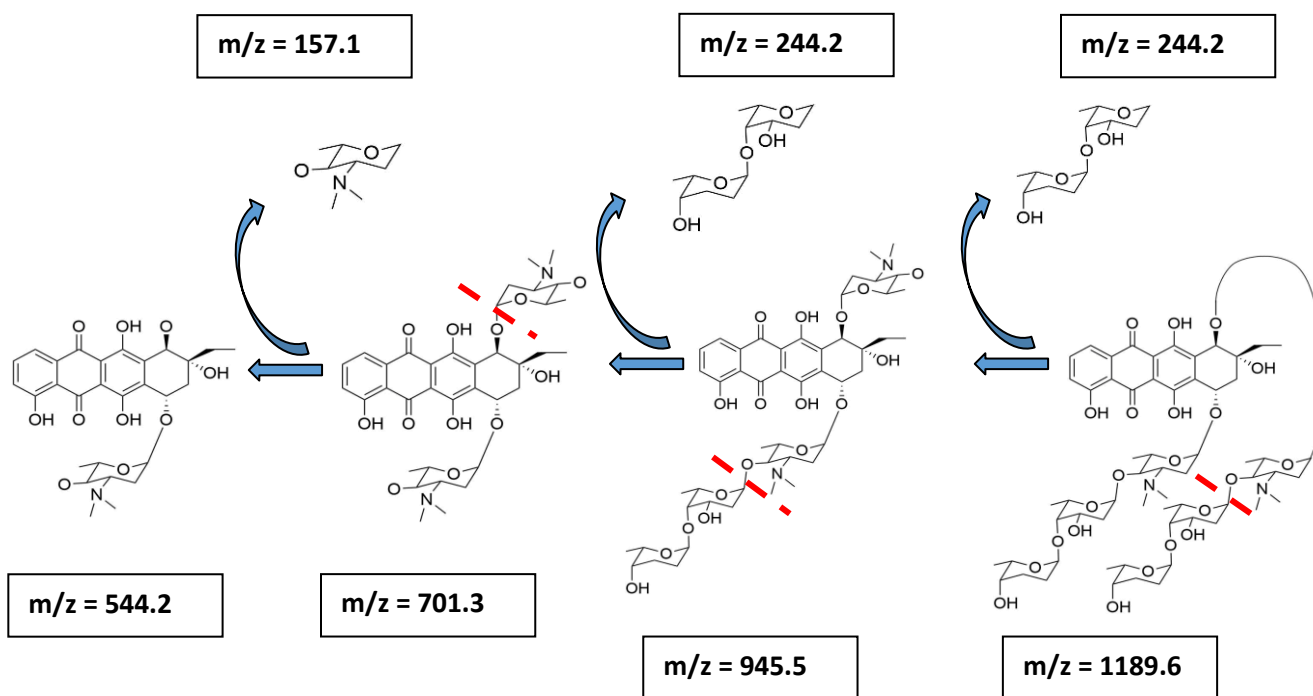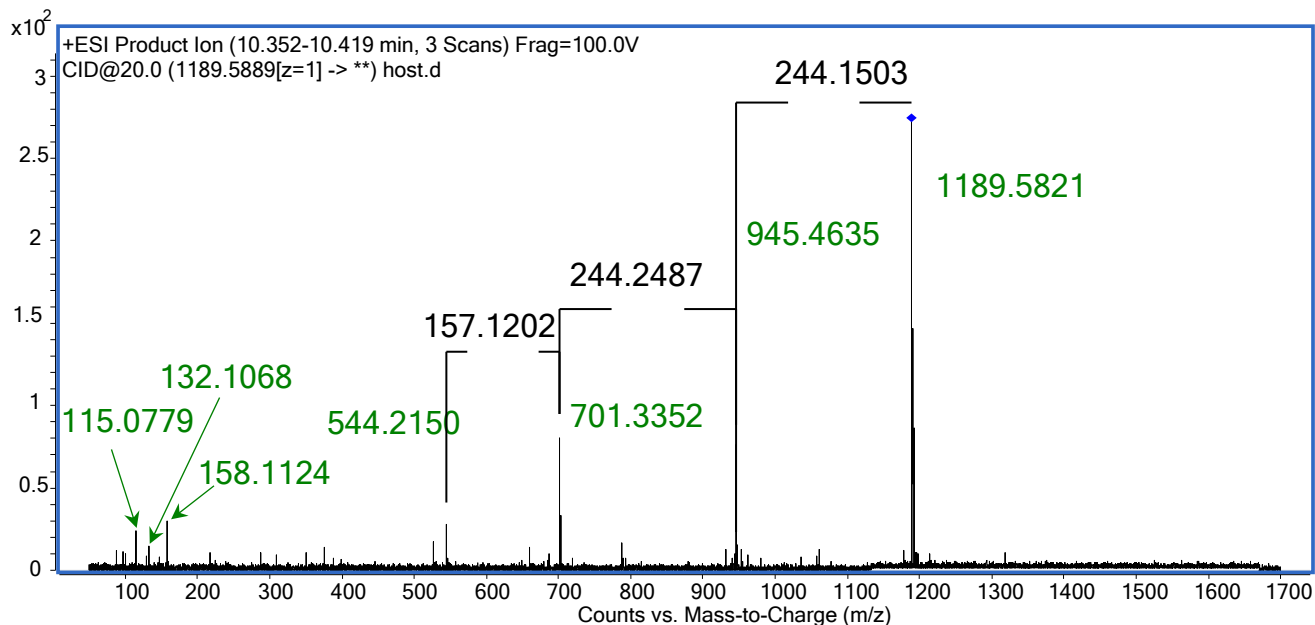

Fragmentation of parent ion 1189.589 shows losses corresponding to sugar moieties of cosmomycin D. The initial loss of 244 mass units correspond to the B ions of rhodinosose and L-2-deoxy-fucose, the two outermost sugars on both the trisaccharide chains. The second loss of 244 corresponds to the same two sugars lost from the second trisaccharide chain. The last shift seen represents the loss of rhodosamine, with a B ion mass of 157. All three sugars can be seen in the lower mass range of the spectrum.

**Figure S7.** MS1 spectrum of cosmomycin analog **3**

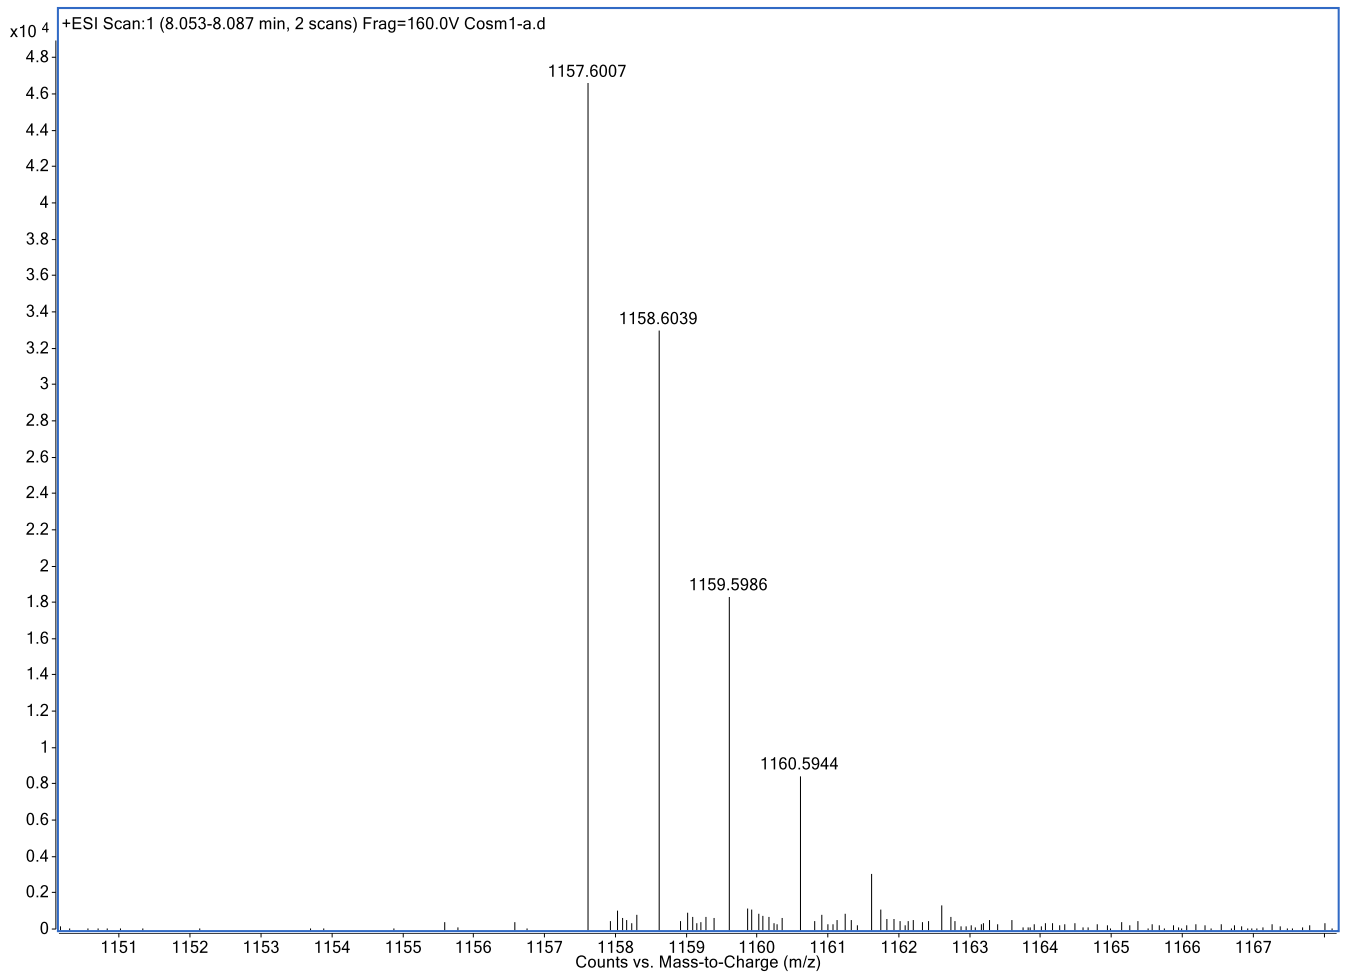



**Figure S8.** MS2 fragmentation analysis of cosmomycin analog **3**

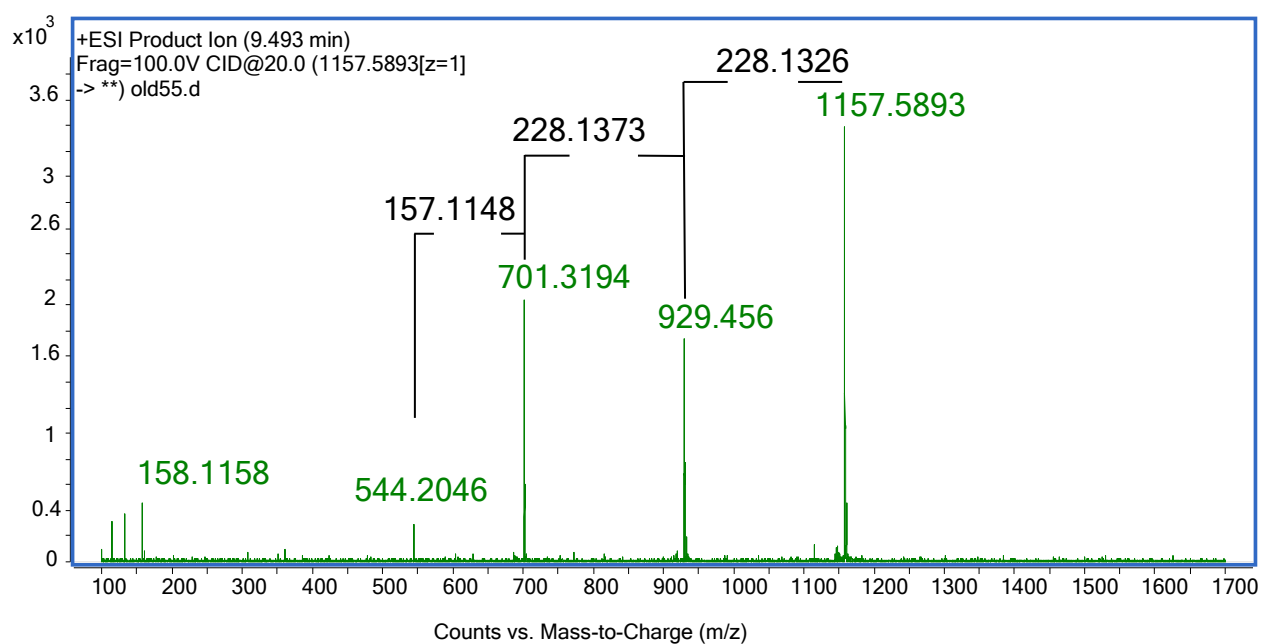

Fragmentation of parent ion 1157.5893 shows losses corresponding to sugar moieties of the previously reported compound A447 C, also reported by Kelso et al<sup>1</sup>. The initial loss of 228 mass units corresponds to the B ions of two rhodnose moieties, the two outermost sugars on one of the trisaccharide chains. The second loss of 228 corresponds to the same moieties lost from the second trisaccharide chain. The final loss of 157 corresponds to a rhodosamine B ion.

**Figure S9.** MS1 spectrum of cosmomycin analog A

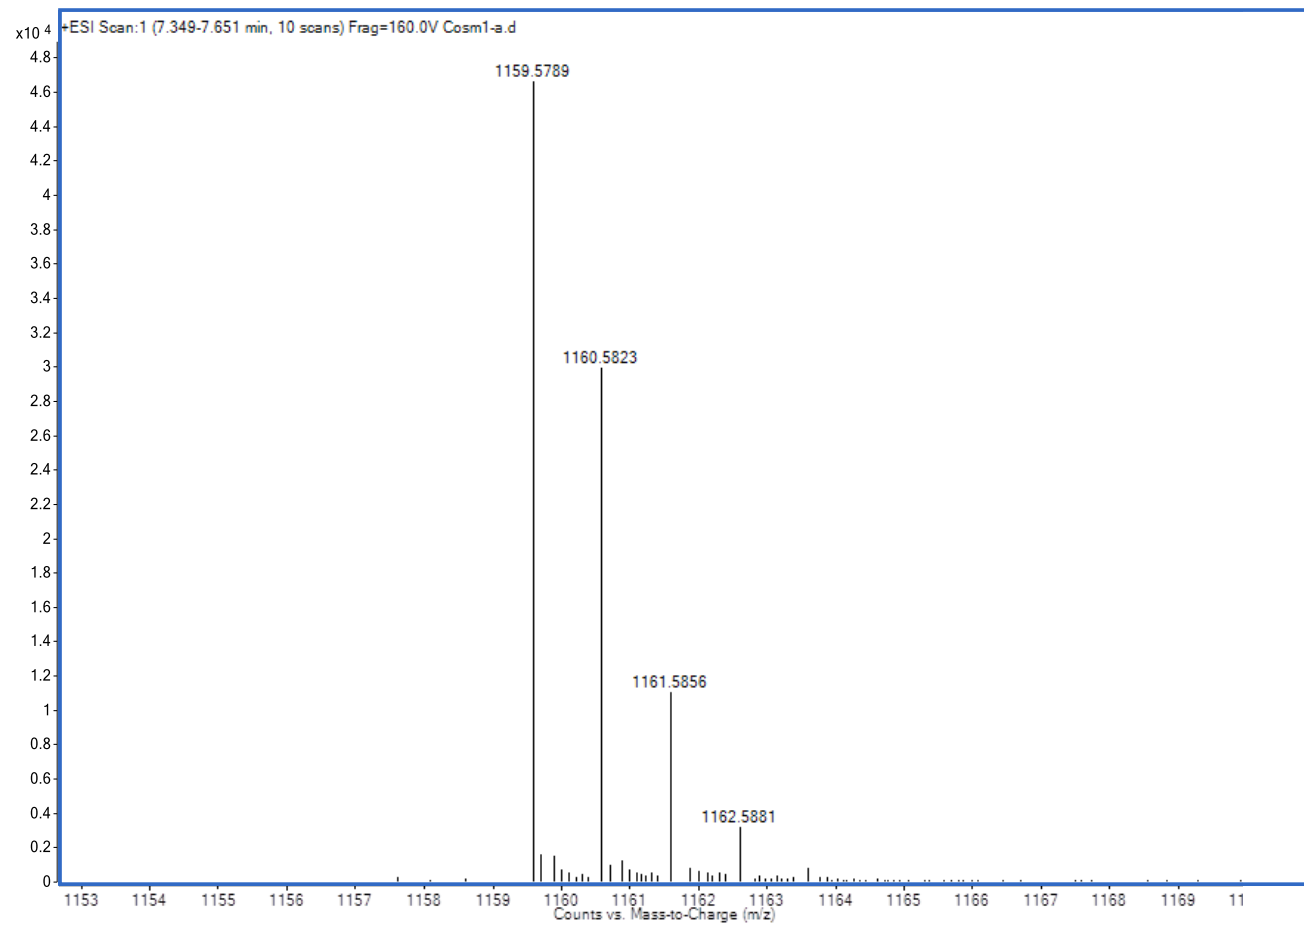

**Figure S10.** MS2 fragmentation analysis of cosmomycin analog A

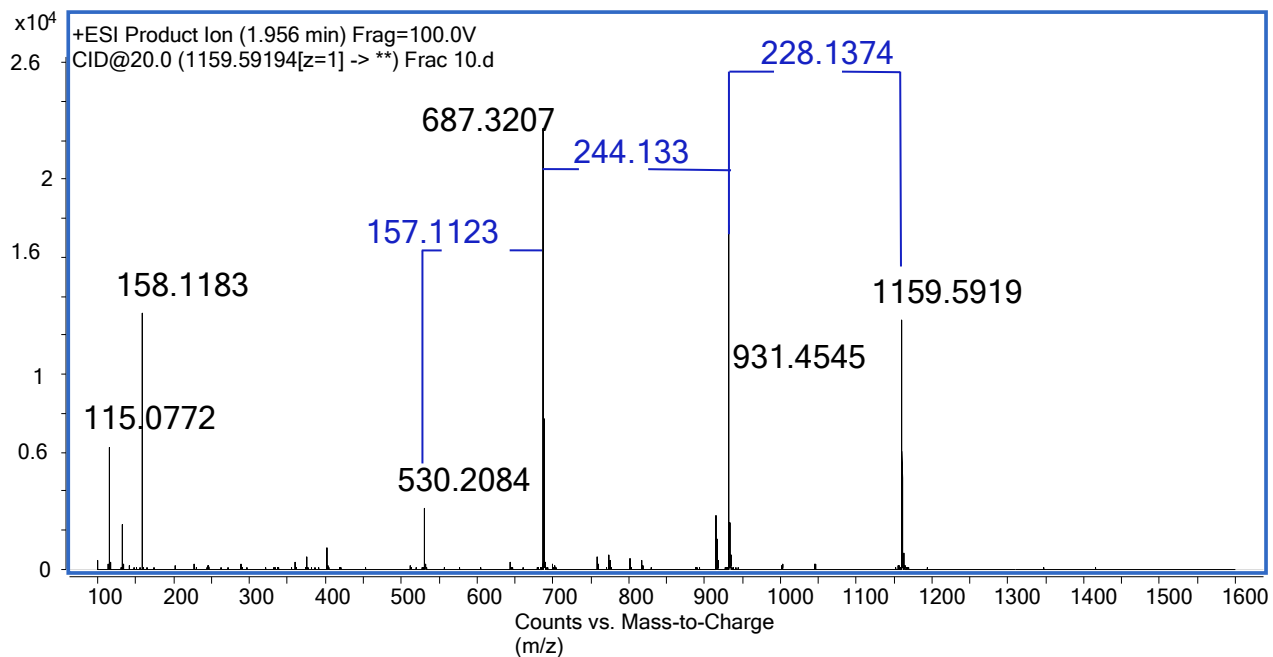

Fragmentation of parent ion 1159.5919 shows an initial loss of 228 mass units corresponding to the B ions of two rhodinoses moieties, the two outermost sugars on one of the trisaccharide chains. The second loss of 244 corresponds to rhodinoses and 2-deoxyfucose lost from the second trisaccharide chain. Although the sugar masses fragmented here are identical to the sugars lost from cosmomycin C, the mass of the rest of the molecule is 14 Daltons lighter than cosmomycin C at each stage of fragmentation. This suggests the lack of a methylene group the aglycone.

**Figure S11.** MS2 fragmentation analysis of cosmomycin analog **B**

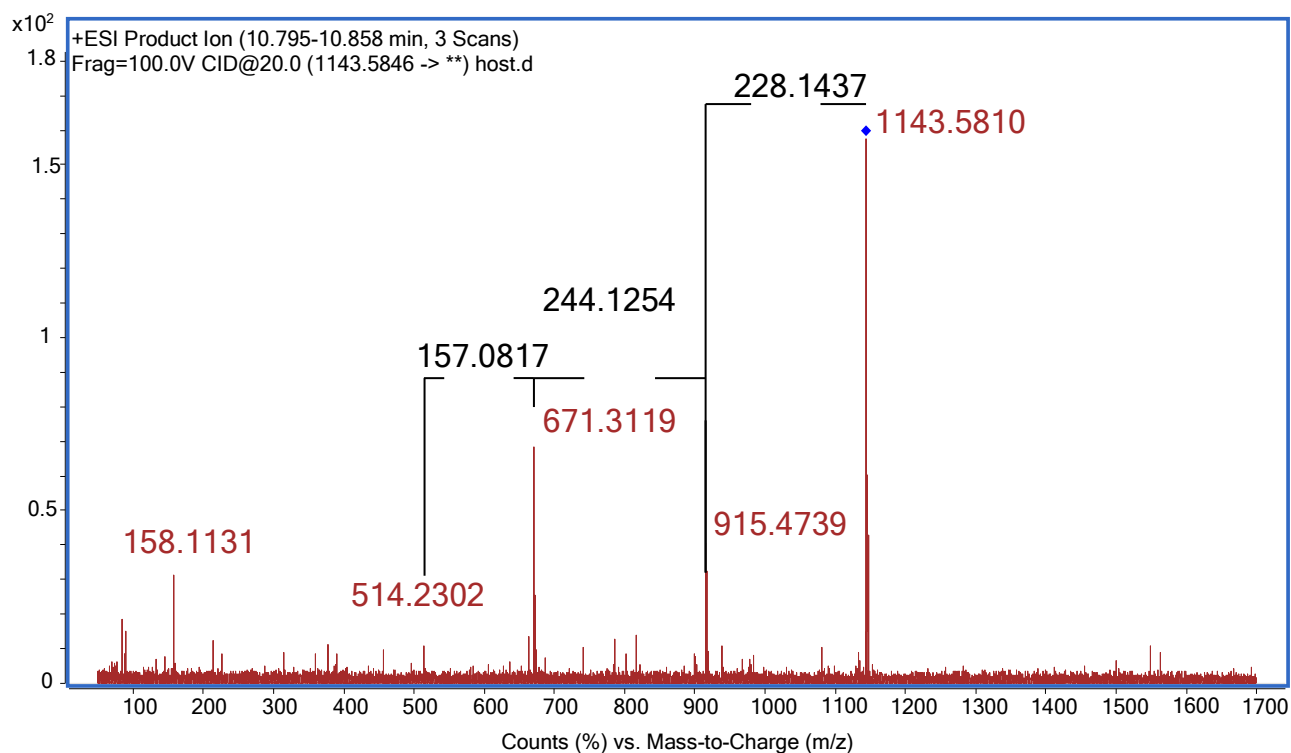

The initial loss of 228 mass units corresponds to the B ions of two rhodnose residues, the two outermost sugar units on one of the trisaccharide chains. The second loss of 244 corresponds to rhodnose and 2-deoxyfucose lost from the second trisaccharide chain. The mass shifts of the sugar moieties fragmented here match the first two fragments of cosmomycin C, indicating the same glycosylation pattern on the four outermost sugars. The mass of the unfragmented molecule, as well as the mass of the first three fragments, show a mass shift of -30 Daltons compared to cosmomycin C. This mass shift is consistent with the loss of an oxygen and a methylene group, suggesting this species is desoxy, desmethyl-cosmomycin C (compound **B**).

**Figure S12.**  $^1\text{H}$  NMR spectrum of cosmomycin C (**1**)

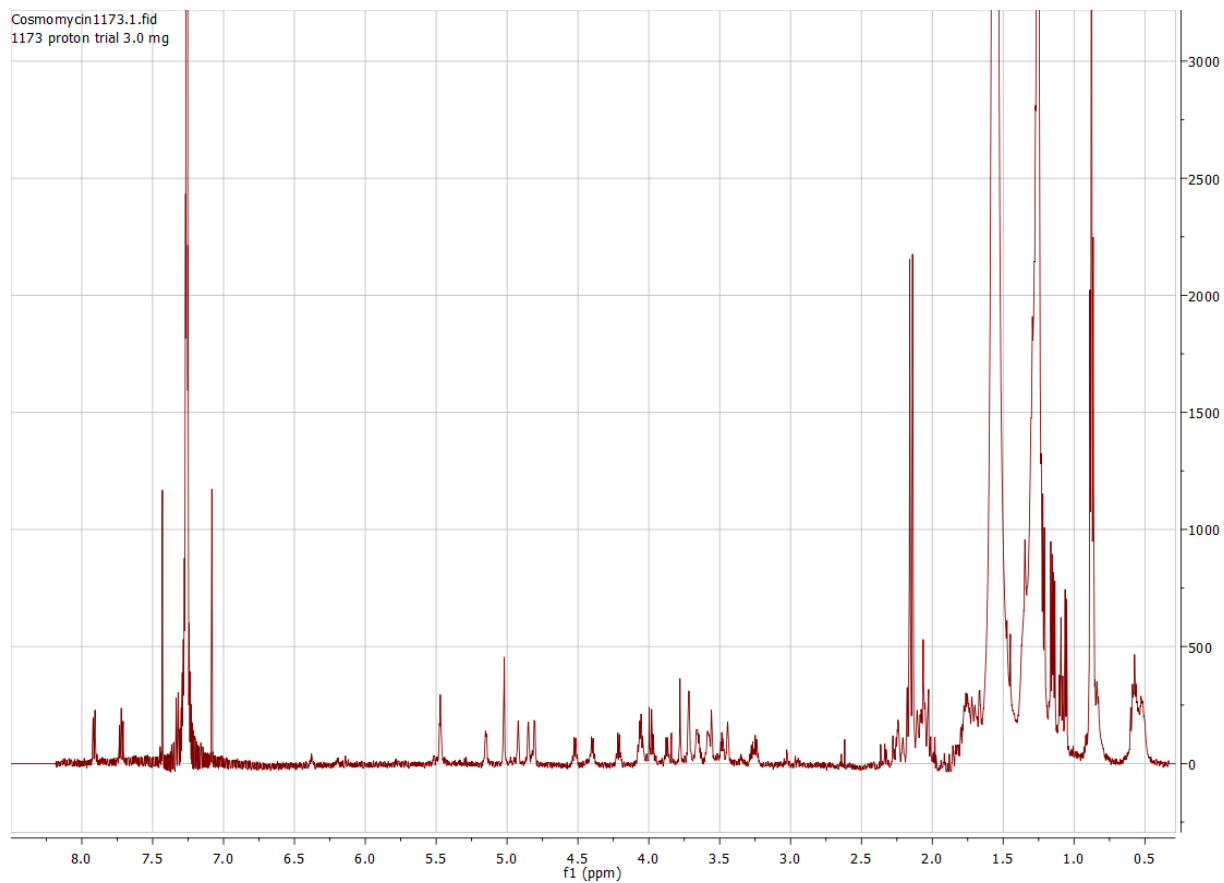

NMR Spectrum of cosmomycin C shows three distinct aromatic protons at 7.92 ppm, 7.72 ppm, and 7.33 ppm. Sugar protons can be seen from 3.5 to 5.5 ppm, and the N-methyl protons from the inner rhodosamines can be seen at 2.17 and 2.14.

**Figure S13.**  $^1\text{H}$  NMR spectrum of **A**

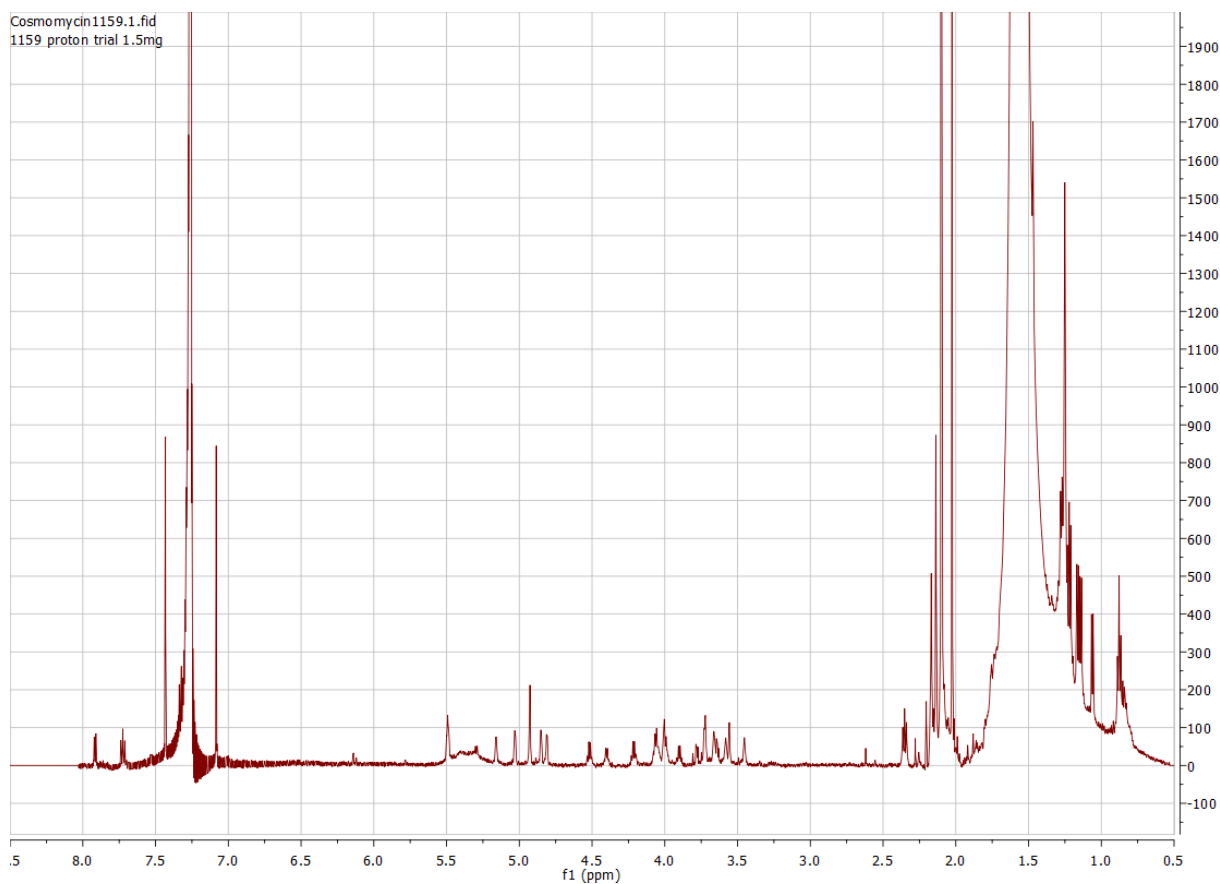

NMR Spectrum of compound **4** shows three distinct aromatic protons at 7.92 ppm , 7.72 ppm, and 7.33 ppm. Sugar protons can be seen from 3.5 to 5.5 ppm, and the N-methyl protons from the inner rhodosamines can be seen at 2.17 and 2.14.

**Figure S14.** Overlaid  $^1\text{H}$  NMR spectrum of **1** and **A**

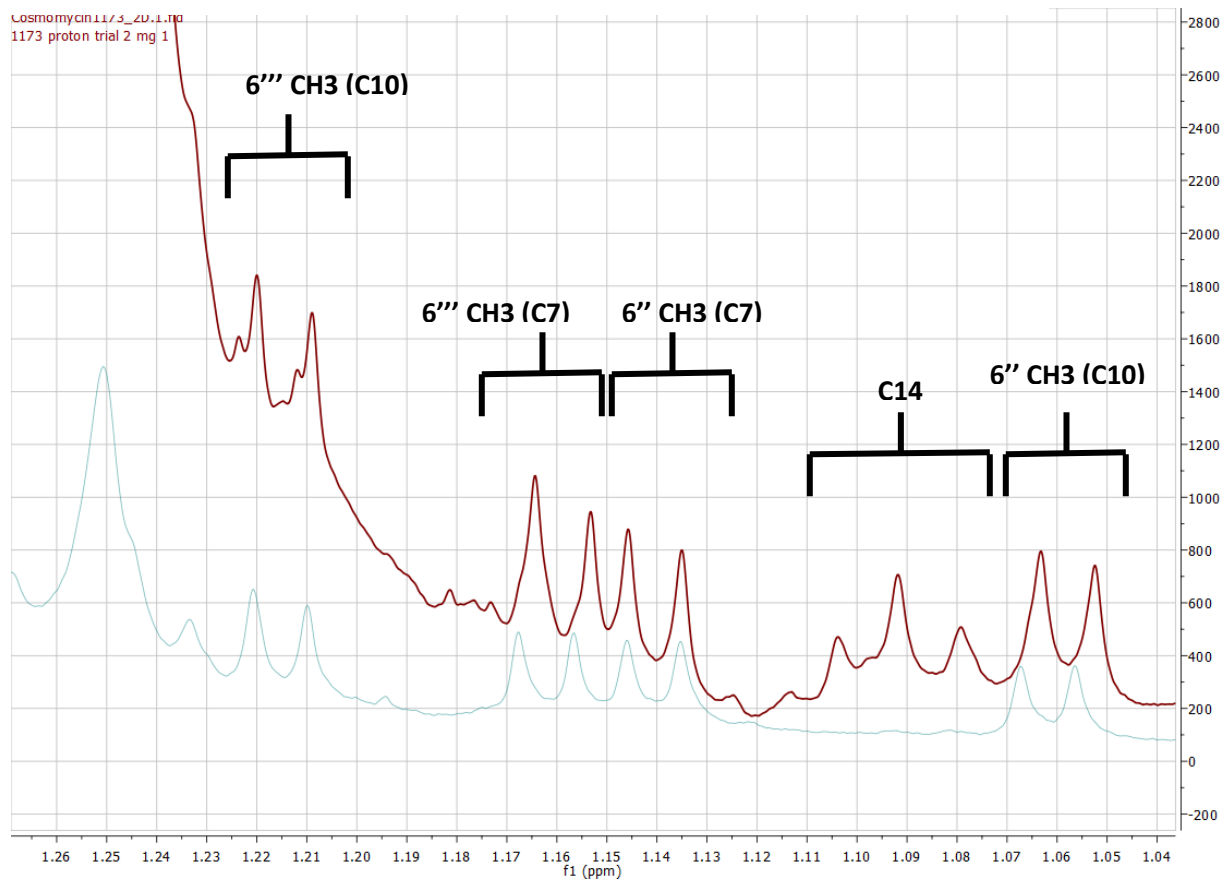

Overlaid  $^1\text{H}$  NMR spectra of compounds **1** (red signal) and **A** (blue signal) show the loss of a triplet signal at 1.09 ppm in compound **A**. This signal corresponds to the C-14 methyl group of the aglycone.<sup>4,5</sup>

Figure S15. HSQC spectrum of **1**

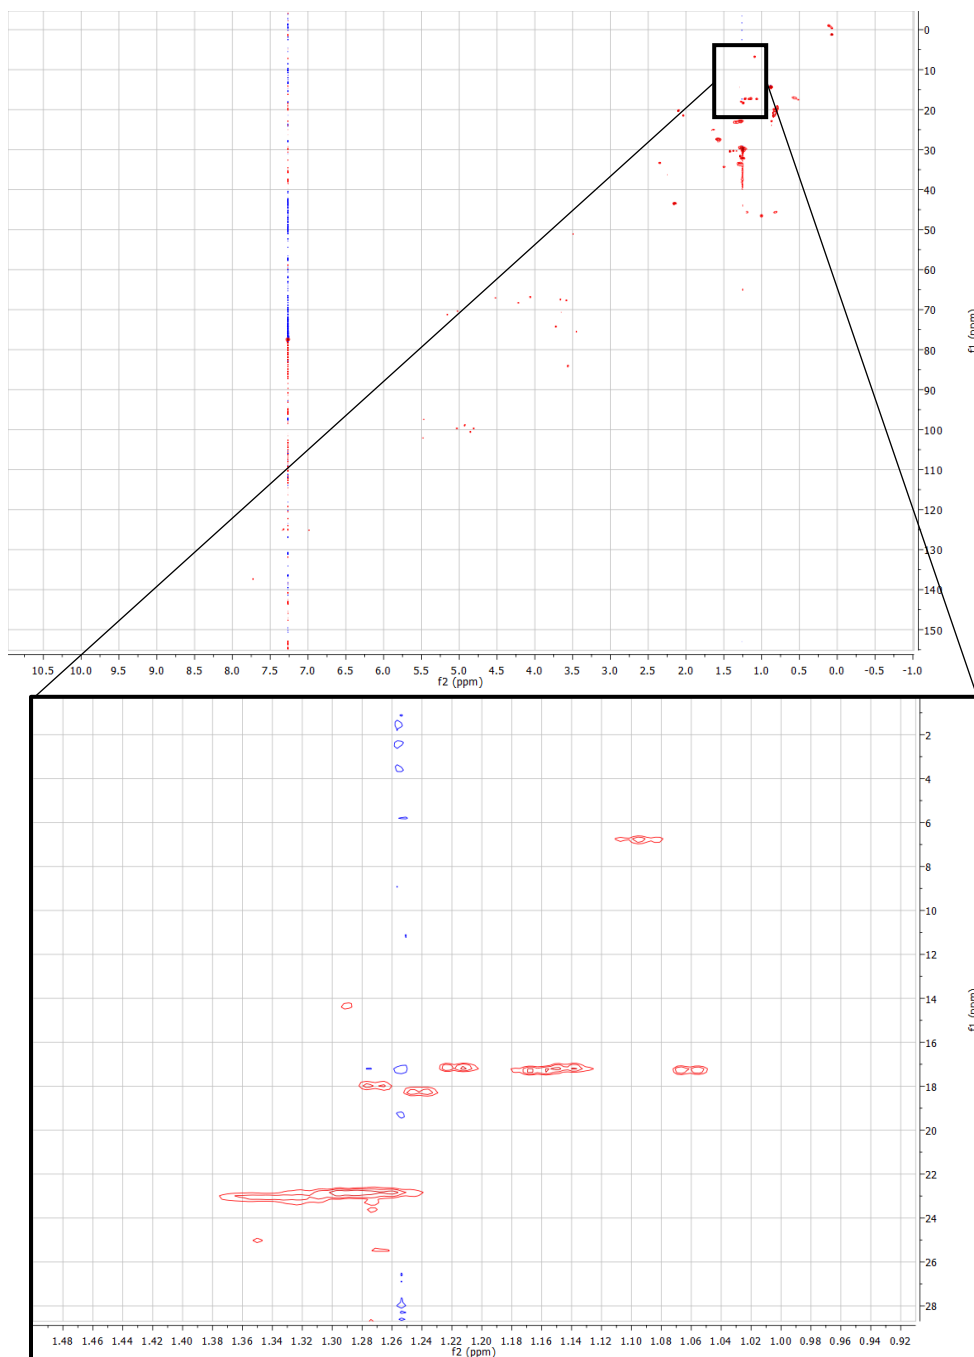

In the HSQC spectrum of compound **1** was acquired using 12.5% non-uniform sampling and reconstructed using SMILE<sup>2</sup> and NMRPipe<sup>3</sup> the triplet at 1.09 can clearly be seen correlating to carbon 14 of the aglycone which has a diagnostic chemical shift of 6.7 ppm. Also in the expanded region, the methyl protons attached to carbon six of all six sugars can be seen correlating to carbons with chemical shifts from ~17 to 18.3 ppm, matching literature values.<sup>4-8</sup>



**Figure S16.** HSQC NMR spectrum of **A**

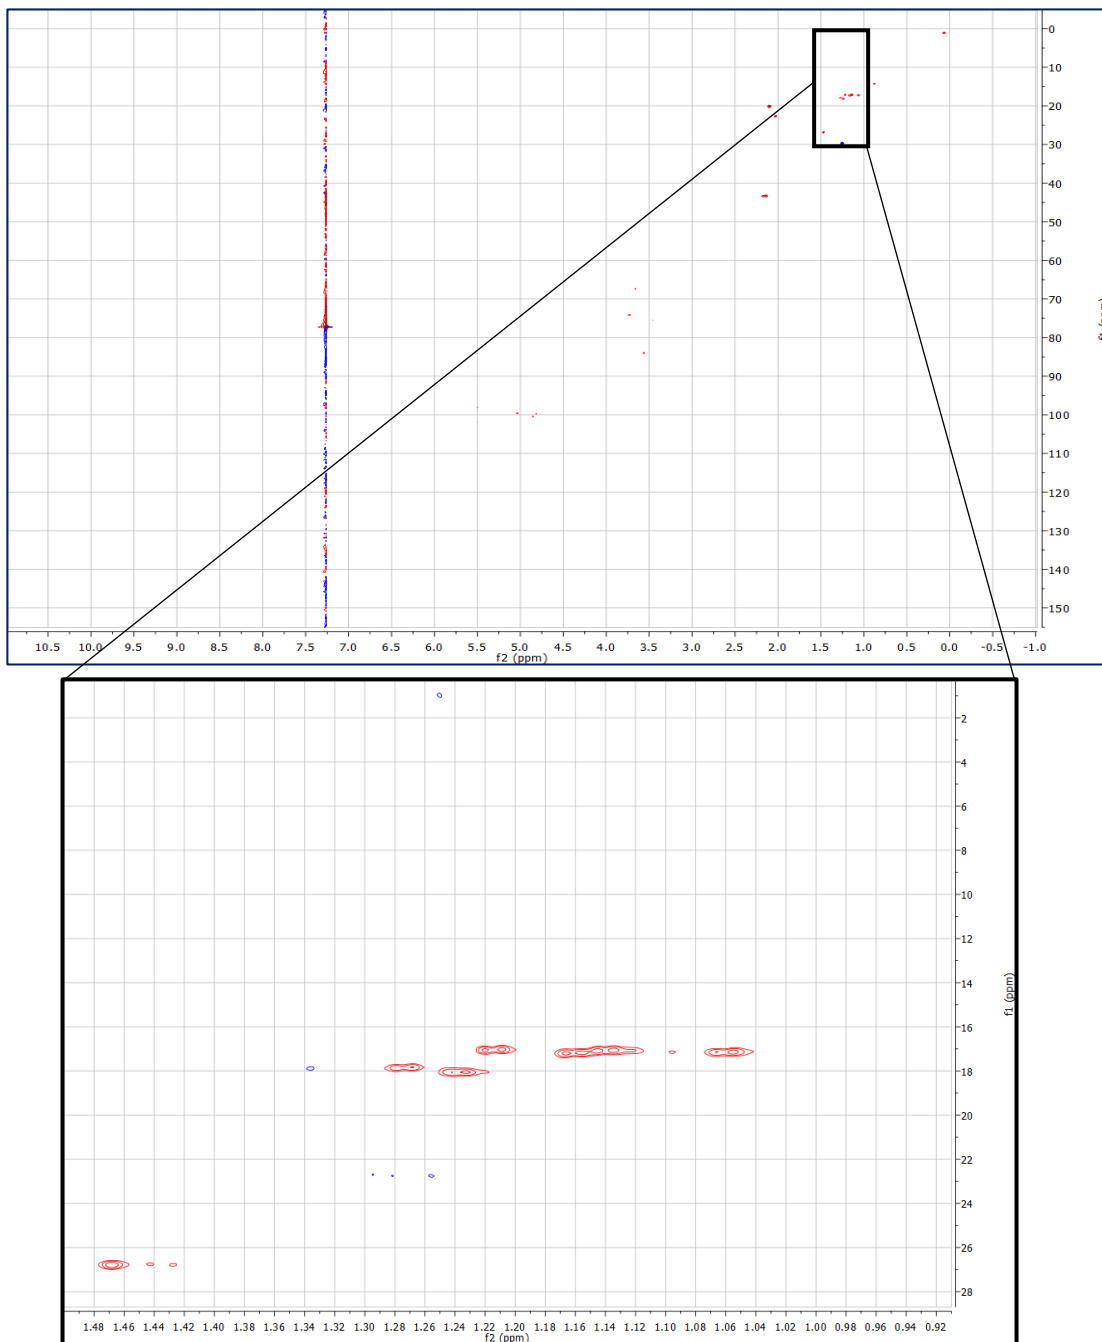

In the HSQC spectrum of compound **A**, the triplet at 1.09 ppm corresponding to carbon 14 is missing, and an additional singlet peak at 1.47 ppm which correlates to a carbon with a chemical shift of 26.8 ppm can be clearly seen. This data suggests the new peak represents carbon 13, which is now a terminal methyl group rather than a methylene. Such a structure is consistent with the canonical propionate PKS starter unit of cosmomycin being replaced by a malonate starter unit in the heterologous host.

**Figure S17.** COSY NMR spectrum of **1**

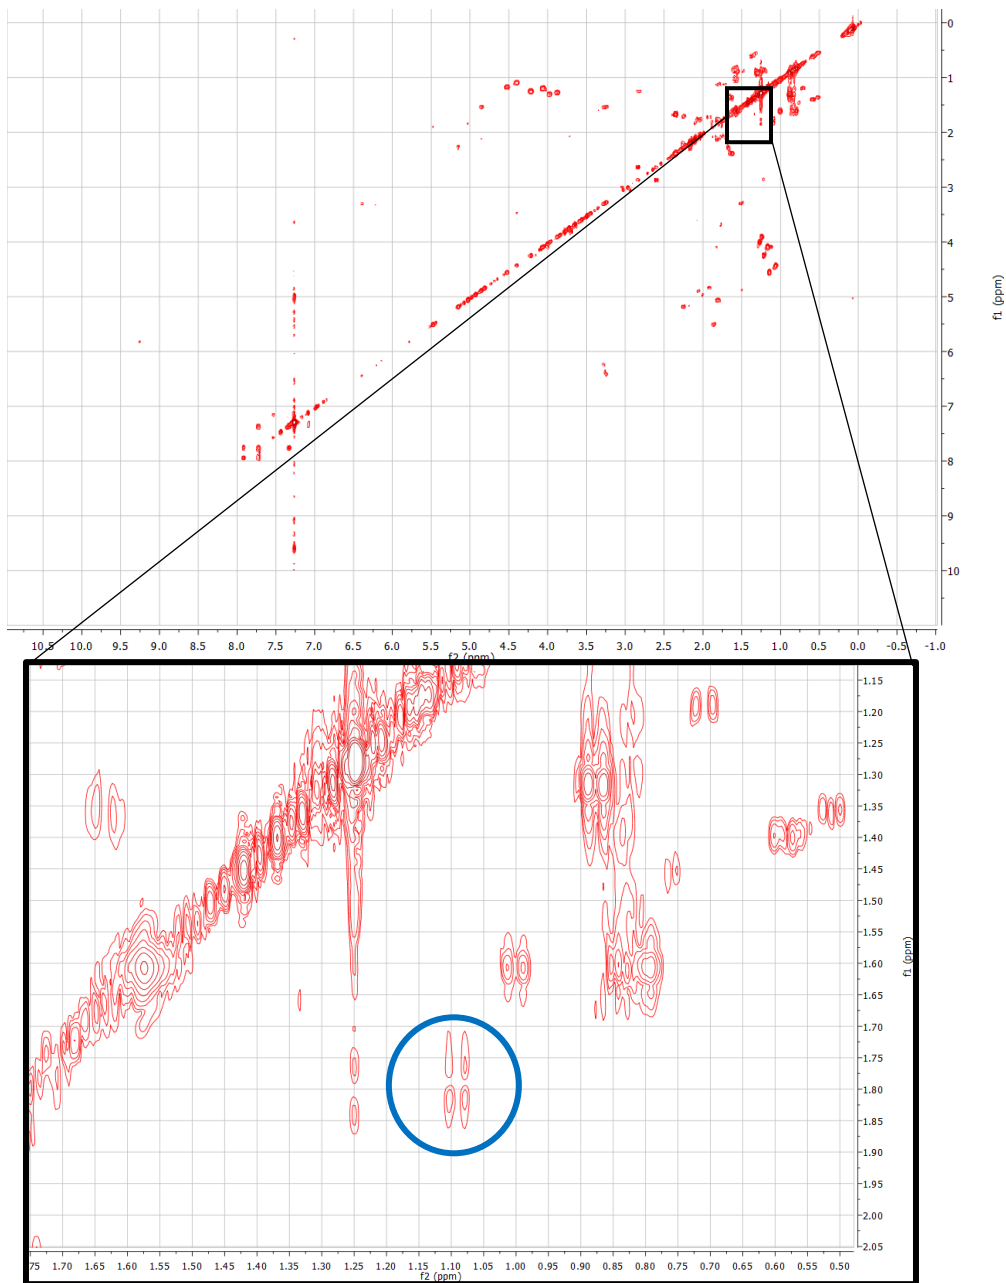

COSY correlation between carbon 14 protons observed at 1.09 ppm and two protons with chemical shifts of 1.76 and 1.82 (circled). These shifts are consistent with literature values for protons 13a and 13b.<sup>6-8</sup>

**Figure S18.** Molecular network of cosmomycin native producers and heterologous host

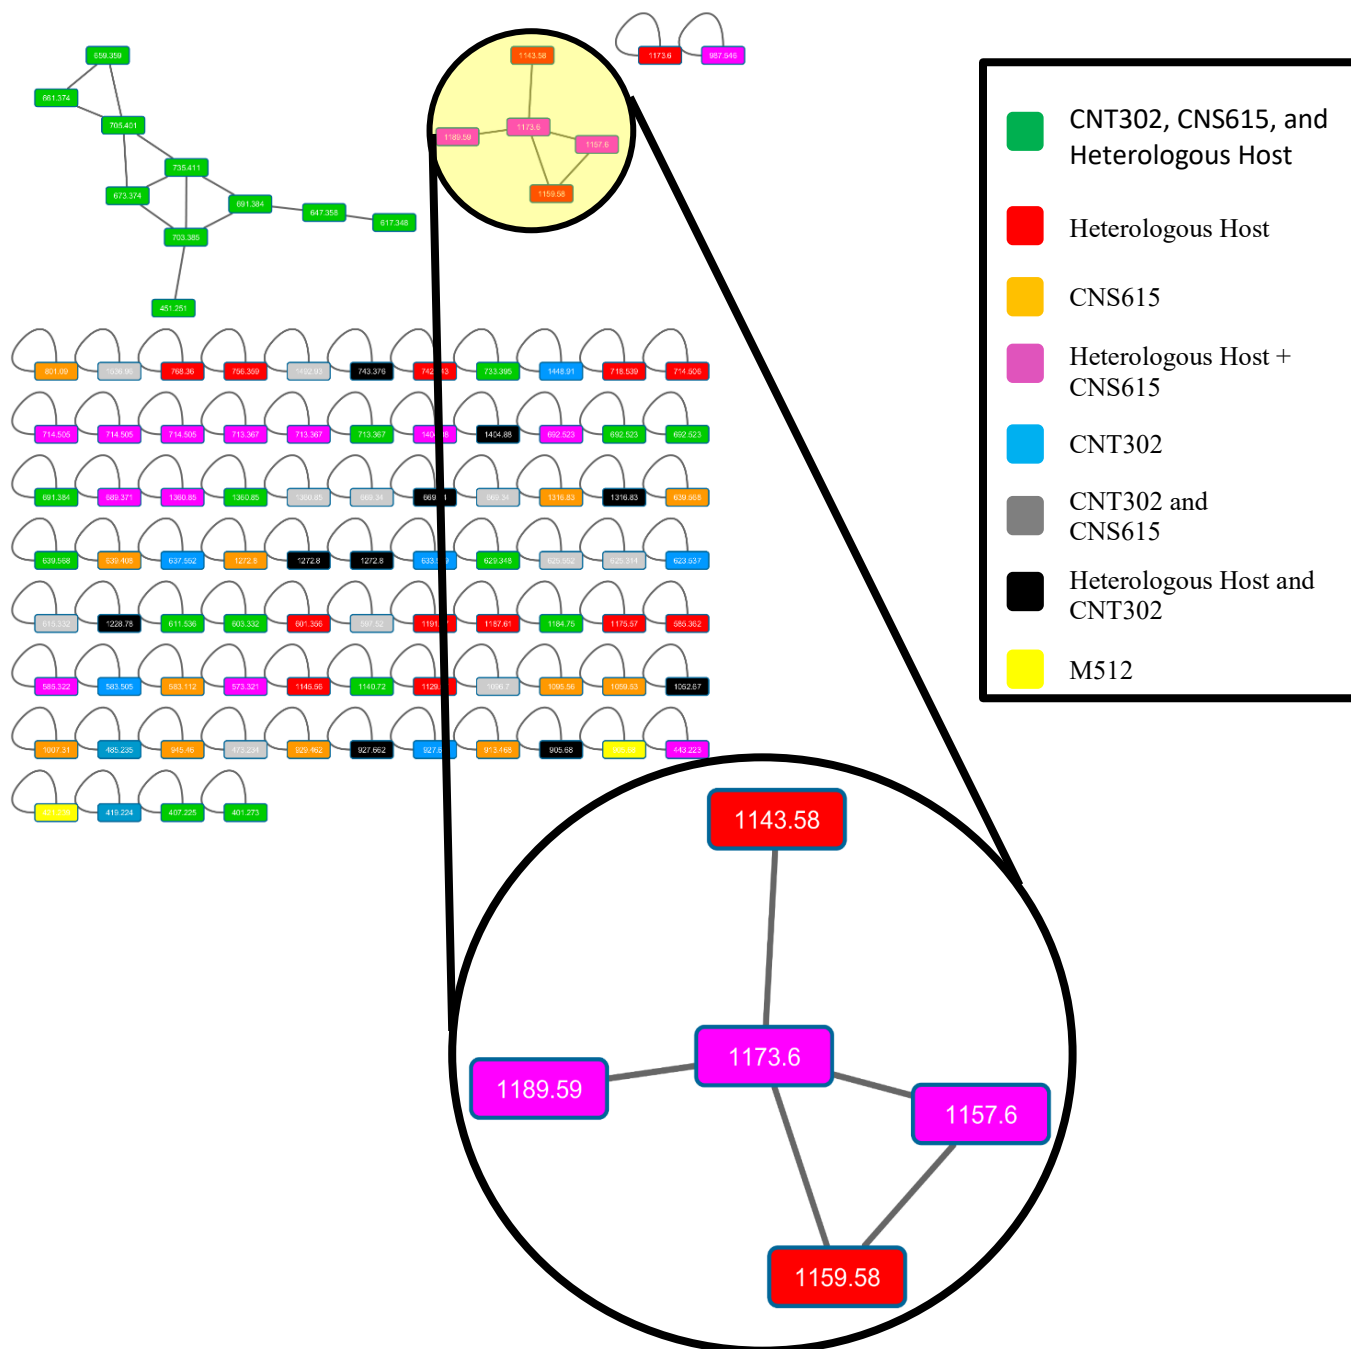

Molecular network generated using the GNPS algorithm.<sup>9,10</sup> Red nodes are found only in the heterologous host, while orange nodes are found only in CNS-615. Nodes colored purple are found in both strains. CNT-302 extracts were included in the networking, but no compounds related to cosmomycin were present. In addition to our own extracts, publicly available data on the strains was also included in the network (MassIVE accession: MSV000078836)<sup>11</sup> and visualization was performed by cytoscape.<sup>12</sup> The cosmomycin molecular family is highlighted and expanded.

Figure S19. *Streptomyces* sp. CNT-302 molecular network

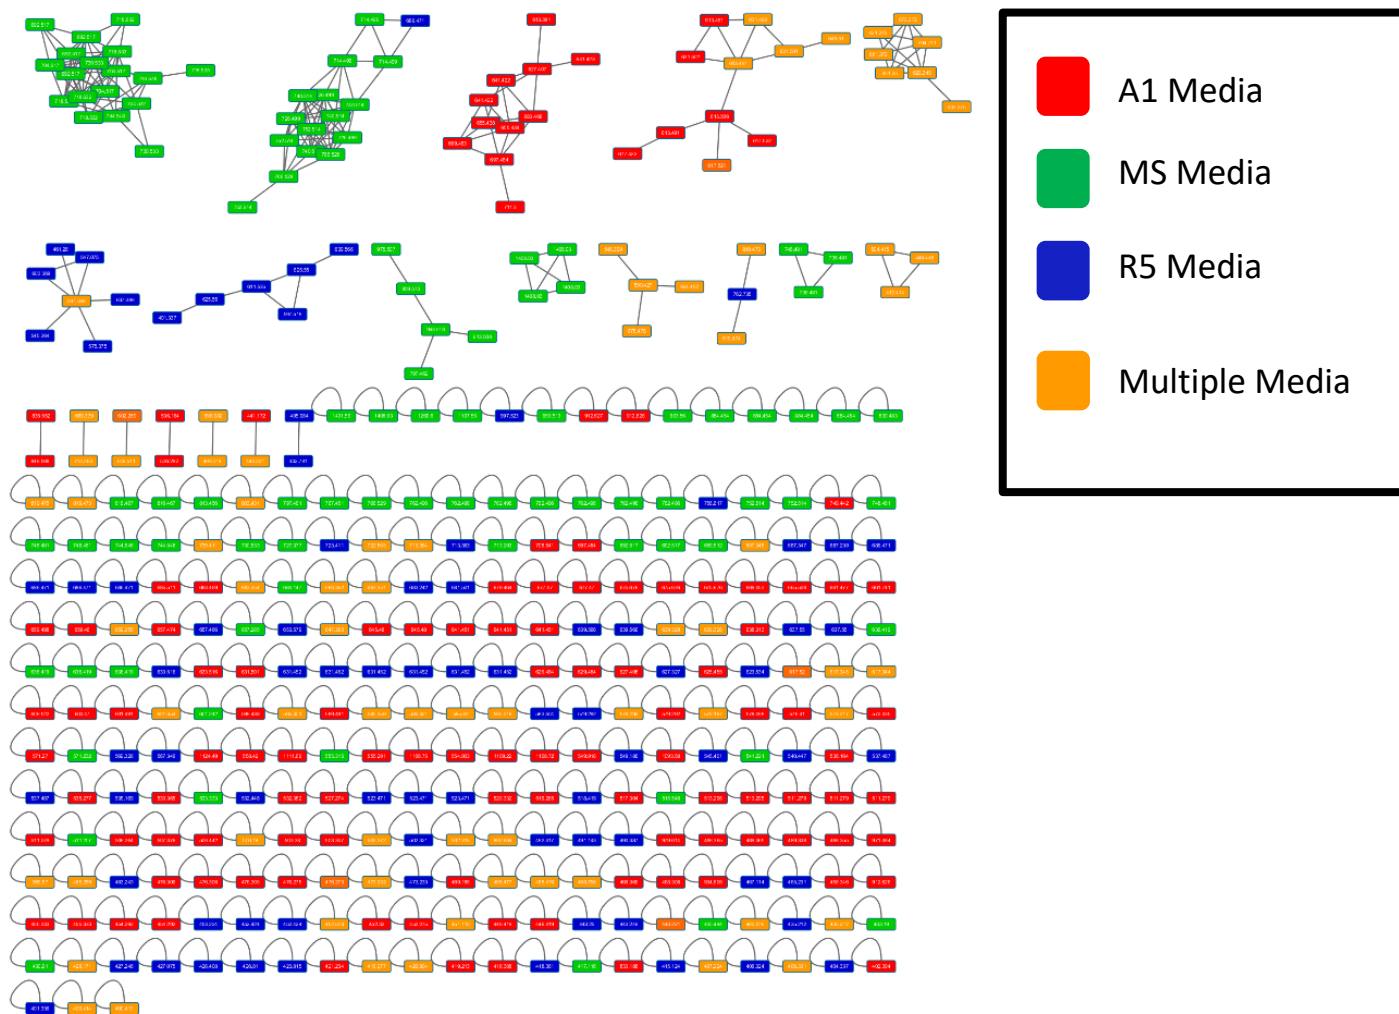

Networking results from CNT-302 butanol, methanol, and ethyl acetate extractions obtained from archived MassIVE data set MSV000078836. No masses matching cosmomycin C, cosmomycin D, or other cosmomycin family members were detected.

**Table S1.** <sup>1</sup>H NMR chemical shift assignments of compounds **1** and **4** and the related cosmomyacin analogs obelmycin C<sup>4</sup> and A447C/D<sup>5</sup>

|    | Obelmycin C                     | A447 C                          | A447 D                          | Cosmomycin C (1)                | Compound A        |
|----|---------------------------------|---------------------------------|---------------------------------|---------------------------------|-------------------|
| R1 | OH                              | H                               | H                               | H                               | H                 |
| R2 | CH <sub>2</sub> CH <sub>3</sub> | CH <sub>3</sub> * |
| R3 | OH                              | H                               | H                               | OH                              | OH                |
| R4 | OH                              | H                               | H                               | H                               | H                 |
| R5 | OH                              | OH                              | =O                              | OH                              | OH                |

\*' denotes a putative assignment not confirmed by full NMR characterization.

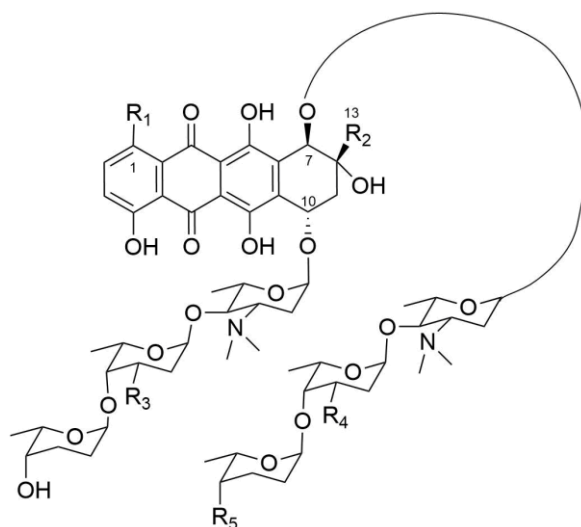

|                 | Obelmycin C        | A447D                       | A447C                      | Cosmomycin C (1)           | (A)                     |
|-----------------|--------------------|-----------------------------|----------------------------|----------------------------|-------------------------|
| <b>Aglycone</b> |                    |                             |                            |                            |                         |
| 1 H             | -                  | dd, J = 7.2, 1.1<br>7.84 Hz | d, J = 7.4<br>7.89 Hz      | 7.91 d, J = 7.2 Hz         | 7.91 d, J = 7.2 Hz      |
| 2H              | d, J=10<br>7.31 Hz | dd, J = 7.4, 7.2<br>7.65 Hz | dd, J = 8.3, 7.4<br>7.7 Hz | t, J = 8.4, 7.8<br>7.72 Hz | 7.72 t, J = 8.4, 7.8 Hz |
| 3H              | d, J=10<br>7.29 Hz | dd, J = 7.2, 1.1<br>7.25 Hz | dd, J = 7.3, 8.3 Hz        | 7.33 d, J = 8.4 Hz         | 7.33 d, J = 8.4 Hz      |
| 7H              | 5.15 br d          | 5.15 m                      | 5.14 m                     | 5.15 br d 3 Hz             | 5.16 br d, J = 3 Hz     |
| 8 Ha            | 2.2                | NR                          | NR                         | NR                         | NR                      |
| 8 Hb            | 2.2                | NR                          | NR                         | NR                         | NR                      |
| 10 H            | 5.02 s             | 5.02 s                      | 5.01 s                     | br s (2<br>5.02 protons)   | 4.92 s (2 protons)      |
| 13 Ha           | NR                 | NR                          | NR                         | NR                         | NR                      |

|                                    |                       |                        |                       |                         |                       |    |
|------------------------------------|-----------------------|------------------------|-----------------------|-------------------------|-----------------------|----|
| 13 Hb                              | NR                    | NR                     | NR                    | NR                      | NR                    | NR |
| 14 CH3                             | 1.1 t, J= 7 Hz        | t, J = 7.4<br>1.1 Hz   | t, J = 7.5<br>1.1 Hz  | 1.09 t, J=7.2 Hz        |                       |    |
| <b>C7</b><br><b>Trisaccharide</b>  |                       |                        |                       |                         |                       |    |
| 1' H                               | d, J = 3.5<br>5.48 Hz | dd, J =<br>5.48 3.4 Hz | d, J = 3.6<br>5.5 Hz  | m (2<br>5.47 protons)   | 5.49 m (2 protons)    |    |
| 2' H                               | NR                    | NR                     | NR                    | NR                      | NR                    |    |
| 3' H                               | NR                    | NR                     | NR                    | NR                      | NR                    |    |
| 4' H                               | 3.73 br s             | 3.73 br s              | 3.78 br s             | 3.78 s                  | 3.78 m                |    |
| 5' H                               | q, J = 7<br>4.06 Hz   | q, J = 6.4<br>3.99 Hz  | q, J = 6.8<br>4 Hz    | 4.06 q, J= 6.6 Hz       | 4.06 q, J = 6.6 Hz    |    |
| 6'-CH3                             | d, J = 7<br>1.27 Hz   | dd, J =<br>1.28 6.4 Hz | d, J = 6.8<br>1.27 Hz | NR                      | NR                    |    |
| 3'-N(CH3)2                         | 2.16 s                | 2.15 s                 | 2.16 s                | 2.14 s (6 protons)      | 2.14 s (6 protons)    |    |
| 1'' H                              | 5.03                  | 5.04 br s              | 4.95 br s             | br s, 2<br>5.02 protons | 5.03 br d, J = 3 Hz   |    |
| 2'' H                              | NR                    | NR                     | NR                    | NR                      | NR                    |    |
| 3'' H                              | 3.98 br d             | NR                     | NR                    | d, J = 10.2<br>3.99 Hz  | 4 br m                |    |
| 4'' H                              | 3.56 br s             | 4.06 m                 | 3.47 br s             | 3.48 m                  | 3.56 s                |    |
| 5'' H                              | q, J = 7<br>4.53 Hz   | q, J = 6.3<br>4.52 Hz  | q, J = 6.7<br>4.44 Hz | 4.52 q, J= 6.6 Hz       | 4.51 q, J = 6.6 Hz    |    |
| 6'' CH3                            | q, J = 7<br>1.14 Hz   | d, J = 6.3<br>1.15 Hz  | d, J = 6.7<br>1.07 Hz | 1.14 d, J=6.6 Hz        | 1.14 d, J = 6.6 Hz    |    |
| 1''' H                             | 4.85 br s             | 4.85 br s              | d, J = 3<br>4.82 Hz   | 4.85 s                  | 4.85 br s             |    |
| 2''' H                             | NR                    | NR                     | NR                    | NR                      | NR                    |    |
| 3''' H                             | NR                    | NR                     | NR                    | NR                      | NR                    |    |
| 4''' H                             | 3.66 br s             | 3.66 br s              | 3.58 br s             | 3.65 m                  | 3.65 m                |    |
| 5''' H                             | q, J = 7<br>4.06 Hz   | q, J = 6.7<br>4.22 Hz  | q, J = 6.8<br>4.06 Hz | 4.06 q, J= 6.6 Hz       | 4.06 q, J = 6.6 Hz    |    |
| 6''' CH3                           | q, J = 7<br>1.16 Hz   | d, J = 6.7<br>1.22 Hz  | d, J = 6.8<br>1.15 Hz | 1.16 d, J=6.6 Hz        | 1.16 d, J = 6.6 Hz    |    |
| <b>C10</b><br><b>Trisaccharide</b> |                       |                        |                       |                         |                       |    |
| 1' H                               | d, J = 3.5<br>5.44 Hz | d, J = 3.5<br>5.46 Hz  | d, J = 3.3<br>5.46 Hz | m (2<br>5.47 protons)   | 5.49 m (2 protons)    |    |
| 2' H                               | NR                    | NR                     | NR                    | NR                      | NR                    |    |
| 3' H                               | NR                    | NR                     | NR                    | NR                      | NR                    |    |
| 4' H                               | 3.73 br s             | 3.73 br s              | 3.72 br s             | br s (2<br>3.72 proton) | 3.72 br s (2 protons) |    |
| 5' H                               | q, J = 7<br>3.88 Hz   | q, J = 6.7<br>3.88 Hz  | q, J = 6.6<br>3.87 Hz | 3.87 q, J= 6.6 Hz       | 3.9 q, J=6.6 Hz       |    |
| 6' CH3                             | d, J = 7<br>1.24 Hz   | d, J = 6.7<br>1.24 Hz  | d, J = 6.6<br>1.23 Hz | NR                      | NR                    |    |
| 3'-N(CH3)2                         | 2.16 s                | 2.17 s                 | 2.16 s                | 2.16 s (6 protons)      | 2.17 s (6 protons)    |    |
| 1'' H                              | 4.93 br s             | 4.92 br s              | 4.92 br s             | 4.92 s (2 protons)      | 4.92 s (2 protons)    |    |
| 2''                                | NR                    | NR                     | NR                    | NR                      | NR                    |    |
| 3'' CH3                            | 1.7, 2.0              | NR                     | NR                    | NR                      | NR                    |    |
| 4'' H                              | 3.45 br s             | 3.55 br s              | 3.44 br s             | 3.45 s                  | 3.45 s                |    |
| 5'' H                              | q, J = 7<br>4.4 Hz    | q, J = 6.3<br>4.44 Hz  | q, J = 6.3<br>4.39 Hz | 4.4 q, J= 6.6 Hz        | 4.4 q, J = 6.6 Hz     |    |

|        |                       |                                     |                       |                          |                    |
|--------|-----------------------|-------------------------------------|-----------------------|--------------------------|--------------------|
| 6" CH3 | d, J = 7<br>1.07 Hz   | d, J = 6.3<br>1.09 Hz               | d, J = 6.3<br>1.06 Hz | 1.06 d, J=6.6 Hz         | 1.06 d, J = 6.6 Hz |
| 1" H   | d, J = 3.5<br>4.81 Hz | t, J = 5.3<br>5.03 Hz               | d, J = 3.2<br>4.8 Hz  | doublet J=<br>4.8 3.6 Hz | 4.81 d, J = 3.6 Hz |
| 2" H   | NR                    | NR                                  | NR                    | NR                       | NR                 |
| 3" H   | NR                    | 2.51<br>ddd, J = 16, 6.7,<br>5.3 Hz |                       | NR                       | NR                 |
|        |                       | ddd, J = 16, 9.5,<br>2.42 5.3 Hz    |                       |                          |                    |
| 4" H   | 3.58 br s             |                                     | 3.58 br s             | 3.57 m                   | 3.58 s             |
| 5" H   | q, J = 7<br>4.22 Hz   | q, J = 6.6<br>4.33 Hz               | q, J = 6.8<br>4.07 Hz | 4.21 q, J= 6.6 Hz        | 4.21 q, J = 6.6 Hz |
| 6" CH3 | d, J = 7<br>1.22 Hz   | d, J = 6.6<br>1.27 Hz               | d, J = 6.6<br>1.17 Hz | 1.21 d, J=6.6 Hz         | 1.21 d, J = 6.6 Hz |

All spectra were recorded in CDCl<sub>3</sub> and spectra for this study were referenced to residual chloroform ( $\delta$ H 7.26).

**Table S2.** Comparison of *Streptomyces* sp. CNT-302 and *S. olindensis* BGCs

| Gene no. on CNT-302 ctg13 | Gene product in CNT-302 (smcog)         | Homologue in <i>S. olindensis</i>            | Identity | Accession no.  |
|---------------------------|-----------------------------------------|----------------------------------------------|----------|----------------|
| 91                        | glucose-1-phosphate thymidyltransferase | glucose-1-phosphate thymidyltransferase      | 97%      | KDN80037.1     |
| 92                        | acyl carrier protein                    | actinorhodin polyketide synthase ACP         | 88%      | WP_031119660.1 |
| 93                        | SARP family transcriptional regulator   | transcriptional regulator                    | 95%      | KDN80039.1     |
| 94                        | methyltransferase                       | methyltransferase                            | 92%      | WP_037757689.1 |
| 95                        | unannotated                             | ester cyclase                                | 95%      | KDN80041.1     |
| 96                        | O-methyltransferase                     | methyltransferase                            | 88%      | KDN80042.1     |
| 97                        | alpha/beta hydrolase fold protein       | short chain dehydrogenase                    | 39%      | WP_037760089.1 |
| 98                        | methyltransferase                       | SAM-dependent methyltransferase              | 89%      | KDN80044.1     |
| 99                        | mono-oxygenase, FAD binding             | FAD-dependent oxidoreductase                 | 94%      | WP_037757693.1 |
| 100                       | oxidoreductase                          | oxidoreductase                               | 91%      | WP_037757695.1 |
| 101                       | CYP450                                  | hypothetical protein                         | 74%      | WP_037757696.1 |
| 102                       | glycosyl transferase                    | glycosyl transferase                         | 94%      | WP_037757699.1 |
| 103                       | aminotransferase                        | lipopolysaccharide biosynthesis protein Rfbh | 95%      | WP_037757701.1 |
| 104                       | short chain dehydrogenase               | ketoacyl reductase                           | 93%      | WP_037757702.1 |
| 105                       | cyclase/dehydrase                       | actinorhodin polyketide cyclase              | 90%      | WP_037757704.1 |
| 106                       | short chain dehydrogenase               | ketoreductase                                | 50%      | WP_037758759.1 |
| 107                       | hypothetical                            | hydroxylacyl-CoA dehydrogenase               | 86%      | WP_051648278.1 |



|     |                                     |                                                             |     |                |
|-----|-------------------------------------|-------------------------------------------------------------|-----|----------------|
| 108 | hypothetical                        | cyclase                                                     | 94% | WP_037757865.1 |
| 109 | methyltransferase                   | SAM-dependent methyltransferase                             | 53% | KDN80044.1     |
| 110 | aminotransferase                    | daunorubicin biosynthesis sensory transduction protein DnrJ | 95% | WP_037757705.1 |
| 111 | hypothetical                        | NDP-hexose 2,3-dehydratase                                  | 88% | WP_051648283.1 |
| 112 | NAD-dependent epimerase/dehydratase | NAD-dependent epimerase                                     | 82% | KDN80058.1     |
| 113 | hypothetical                        | dTDP-4-dehydrorhamnose 3,5-epimerase                        | 89% | WP_037757707.1 |
| 114 | glycosyl transferase                | CosK                                                        | 95% | ABC00725.1     |
| 115 | PadR transcriptional regulator      | CosS                                                        | 95% | ABC00736.1     |
| 116 | ornithine cyclodeaminase            | hypothetical protein                                        | 81% | WP_037757710.1 |
| 117 | hypothetical                        | CosX                                                        | 91% | ABC00737.1     |
| 118 | Beta-Ketoacyl Synthase (T2pks)      | Beta-ACP synthase                                           | 94% | WP_037757712.1 |
| 119 | Beta-Ketoacyl Synthase (clf)        | Beta-ketoacyl synthase                                      | 90% | WP_037757715.1 |
| 120 | 3-oxoacyl ACP synthase              | 3-oxoacyl ACP synthase                                      | 91% | WP_037757720.1 |
| 121 | malonyl-CoA ACP transacylase        | CosF                                                        | 83% | ABC00730.1     |
| 122 | cytochrome CYP450                   | cytochrome CYP450                                           | 83% | WP_037757725.1 |
| 123 | glycosyl transferase                | glycosyl transferase family 28                              | 94% | WP_037757728.1 |
| 124 | NAD dependent epimerase/dehydratase | dTDP-glucose 4,6-dehydratase                                | 94% | WP_037757730.1 |
| 125 | ABC transporter ATP binding protein | CosI                                                        | 94% | ABC00731.1     |
| 126 | ABC-2 transporter                   | multidrug ABC transporter permease                          | 97% | WP_037757733.1 |
| 127 | hypothetical                        | glutathione peroxidase                                      | 87% | WP_037757871.1 |

|     |                                           |                                                 |     |                |
|-----|-------------------------------------------|-------------------------------------------------|-----|----------------|
| 128 | ABC transporter ATP binding protein       | daunorubicin resistance protein DrrC            | 94% | KDN80074.1     |
| 129 | hypothetical                              | hypothetical protein DF19_01985                 | 77% | KDN77779.1     |
| 130 | PadR transcriptional regulator            | transcriptional regulator                       | 76% | KDN77778.1     |
| 131 | hypothetical                              | membrane protein                                | 51% | WP_031115629.1 |
| 132 | hypothetical                              | ribonuclease BN                                 | 67% | KDN74392.1     |
| 133 | hypothetical                              | membrane protein                                | 86% | KDN73505.1     |
| 134 | hypothetical                              | hypothetical protein                            | 42% | WP_037764046.1 |
| 135 | extracytoplasmic-function sigma-70 factor | RNA polymerase sigma factor                     | 64% | KDN79303.1     |
| 136 | hypothetical                              | hypothetical protein DF19_30470                 | 47% | KDN79723.1     |
| 137 | hypothetical                              | oxidoreductase                                  | 60% | KDN78332.1     |
| 138 | hypothetical                              | hypothetical protein DF19_13800                 | 31% | KDN77257.1     |
| 139 | hypothetical                              | antitermination regulator                       | 40% | WP_037761378.1 |
| 140 | Sensor histidine kinase                   | histidine kinase                                | 62% | WP_037761461.1 |
| 141 | hypothetical                              | ATPase                                          | 43% | KDN79305.1     |
| 142 | hypothetical                              | metal ABC transporter substrate-binding protein | 52% | KDN79304.1     |
|     |                                           |                                                 |     |                |

## REFERENCES

- (1) Kelso, C.; Rojas, J. D.; Furlan, R. L.; Padilla, G.; Beck, J. L. *Eur J Mass Spectrom* **2009**, *15*, 73-81.
- (2) Johdo, O.; Watanabe, Y.; Ishikura, T.; Yoshimoto, A.; Naganawa, H.; Sawa, T.; Takeuchi, T. *J Antibiot (Tokyo)* **1991**, *44*, 1130-1140
- (3) Shimosaka, A.; Hayakawa, Y.; Nakagawa, M.; Furihata, K.; Seto, H.; Otake, N. *J Antibiot (Tokyo)* **1987**, *40*, 116-121.
- (4) J. Ying, F. Delaglio, D.A. Torchia, and A. Bax. *J Biomol NMR*, in press **2016**.
- (5) F. Delaglio, S. Grzesiek, G. W. Vuister, G. Zhu, J. Pfeifer and A. Bax. *J. Biomol. NMR*, **1995**, *6*, 277-293.
- (6) Johdo, O.; Watanabe, Y.; Ishikura, T.; Yoshimoto, A.; Naganawa, H.; Sawa, T.; Takeuchi, T. *J Antibiot (Tokyo)* **1991**, *44*, 1121-1129.
- (7) Johdo, O.; Tone, H.; Okamoto, R.; Yoshimoto, A.; Naganawa, H.; Sawa, T.; Takeuchi, T., Anthracycline metabolites from *Streptomyces violaceus* A262. V. New anthracycline alldimycin A: a minor component isolated from obelmycin beer. *J Antibiot (Tokyo)* **1991**, *44*, 1160-1164.
- (8) Johdo, O.; Tone, H.; Okamoto, R.; Yoshimoto, A.; Naganawa, H.; Sawa, T.; Takeuchi, T. *J Antibiot (Tokyo)* **1991**, *44*, 1155-1159.
- (9) Bandeira, N.; Tsur, D.; Frank, A.; Pevzner, P. A. *Proc Natl Acad Sci U S A* **2007**, *104*, 6140-6145.
- (10) Nguyen, D. D.; Wu, C. H.; Moree, W. J.; Lamsa, A.; Medema, M. H.; Zhao, X.; Gavilan, R. G.; Aparicio, M.; Atencio, L.; Jackson, C.; Ballesteros, J.; Sanchez, J.; Watrous, J. D.; Phelan, V. V.; van de Wiel, C.; Kersten, R. D.; Mehnaz, S.; De Mot, R.; Shank, E. A.; Charusanti, P.; Nagarajan, H.; Duggan, B. M.; Moore, B. S.; Bandeira, N.; Palsson, B. O.; Pogliano, K.; Gutierrez, M.; Dorrestein, P. C. *Proc Natl Acad Sci U S A* **2013**, *110*, E2611-2620.
- (11) Crüsemann, M.; O'Neill, E.; Larson, C.; Melnik, A.; Floros, D.; da Silva, R.; Jensen, P.; Dorrestein, P.; Moore, B.S. *Journal of Natural Products* **2016**, epub November 11, 2016.
- (12) Shannon, P.; Markiel, A.; Ozier, O.; Baliga, N. S.; Wang, J. T.; Ramage, D.; Amin, N.; Schwikowski, B.; Ideker, T. *Genome Res* **2003**, *13*, 2498-2504.
